# Supplementary material
Source: MDPI journal article supplement (https://www.mdpi.com/2813-2998/2/2/22)
Supplement: s1 [file s1]

## Supplementary Information

### Supplementary Figures

**Figure S1.** Docking results according to scoring functions (Chemscore and ChemPLP) and a function term (ChemScore's  $\Delta G$ ). Charts representing boxplots for Chemscore,  $\Delta G$ , and ChemPLP values of the **(a)** control, **(b)** natural) and **(c)** synthetic compounds under study. For a given chart, each dot in a box plot represents a score for a compound in a docking condition, varying by RBD-containing structure, absence or presence of mutation, and according to region. Outliers beyond the range shown in the charts were omitted.

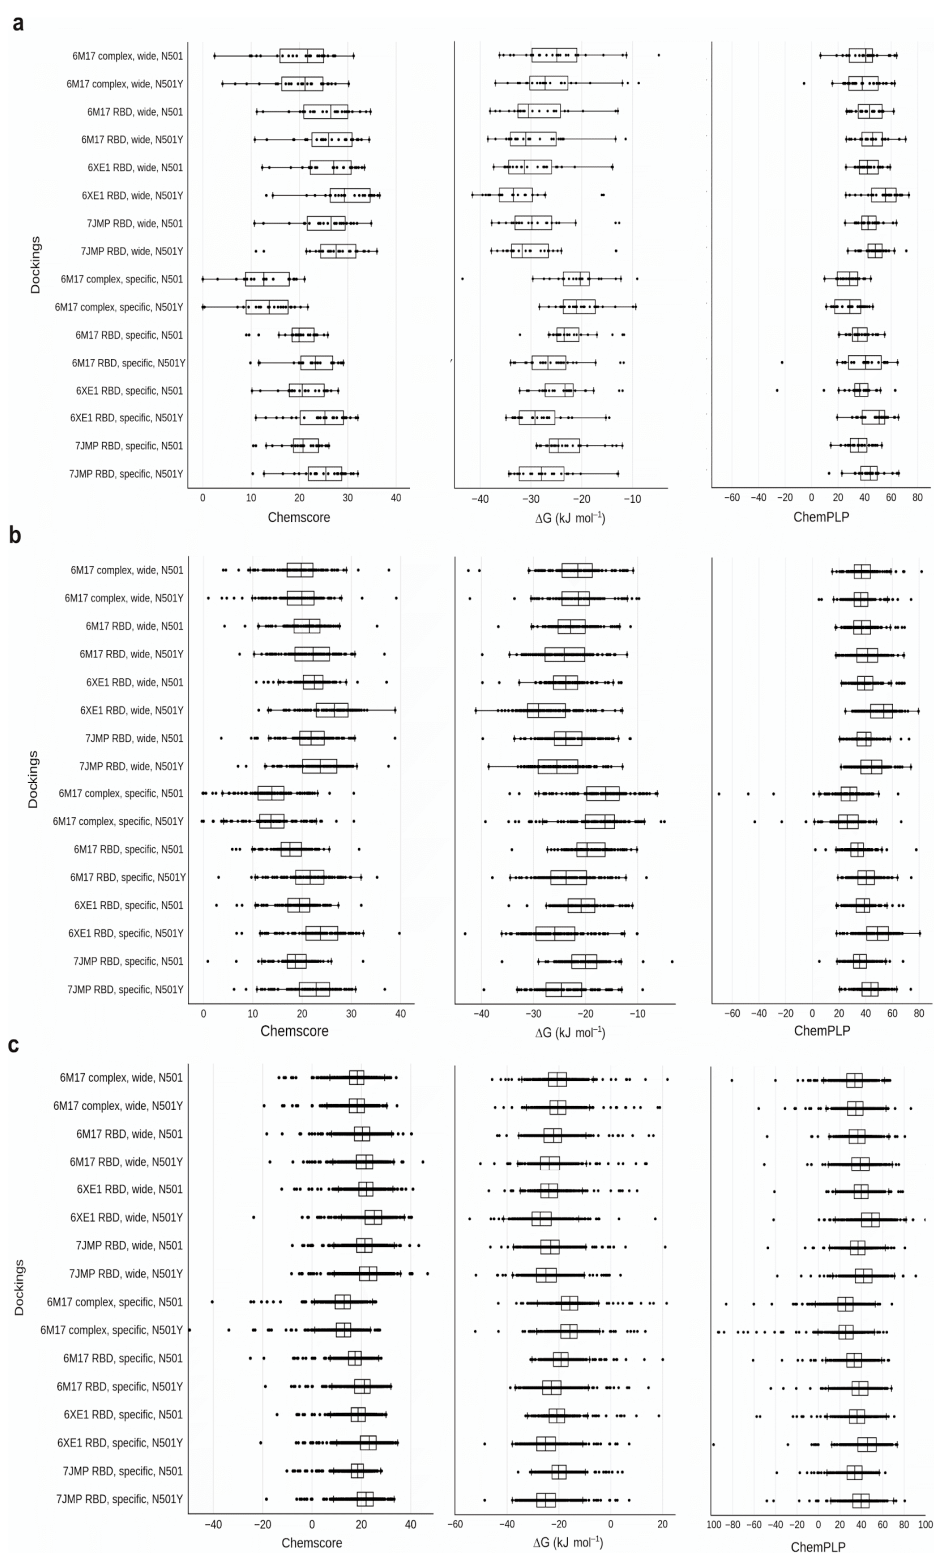

**Figure S2. Correlation matrices between the functions and their terms employed to evaluate the docking results of the wide region.** Correlation matrices for control (a-d), natural (e-h), and synthetic (i-l) compounds docked with N501 (a, b, e, f, i, j) and N501Y (c, d, g, h, k, l) RBD-containing structures, applying Pearson's (a, c, e, g, i, k) and Spearman's coefficients (b, d, f, h, j, l) to the mean results of each compound docked in the wide region. Chemscore function used for scoring is composed of the following terms:  $\Delta G$  (binding energy), H bond (score for hydrogen bonds), Lipo. (protein-ligand lipophilic term contribution), H rot. (ligand conformational entropy loss when binding to the protein), Int. H bond (internal H bond, ligand intramolecular H bond contribution), DE clash (protein-ligand steric hindrance), DE int. (internal ligand torsional strain penalty), Int. cor. (internal ligand energy offset). ChemPLP used for rescoring presents an RMSD term (root mean square deviation between all conformations run for a ligand).

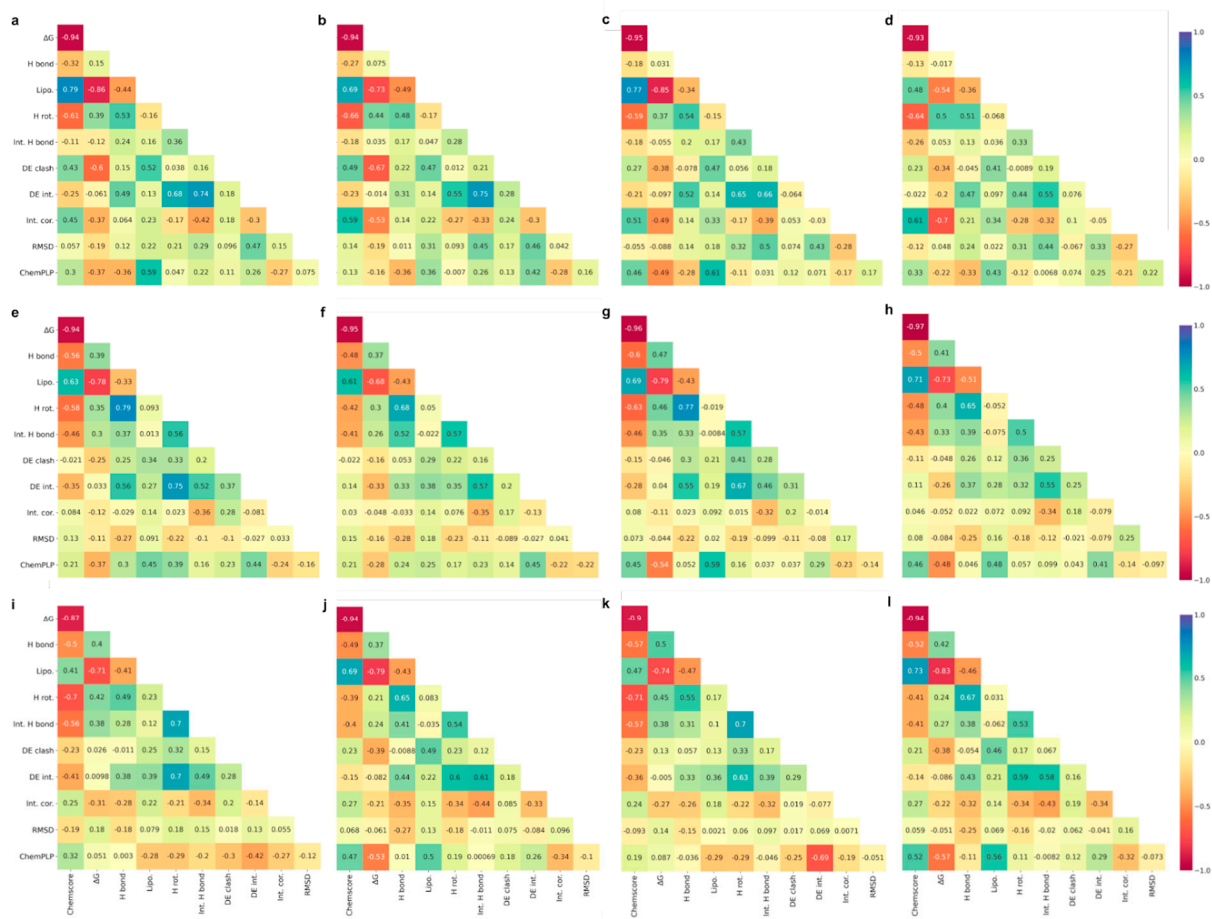

**Figure. S3. Correlation matrices between ADME-related properties, the main functions, and terms used to evaluate the docking results of the wide region.** Correlation matrices for control (a-b), natural (c-e), and synthetic (e-f) compounds, applying Pearson's (a, c, e) and Spearman's (b, d, f) coefficients. Each chart shows ADME-related properties, calculated from SwissADME, alongside Chemscore,  $\Delta G$ , and ChemPLP mean results of each compound docked in the wide region of N501 and N501Y (indicated by an asterisk) RBD-containing structures.

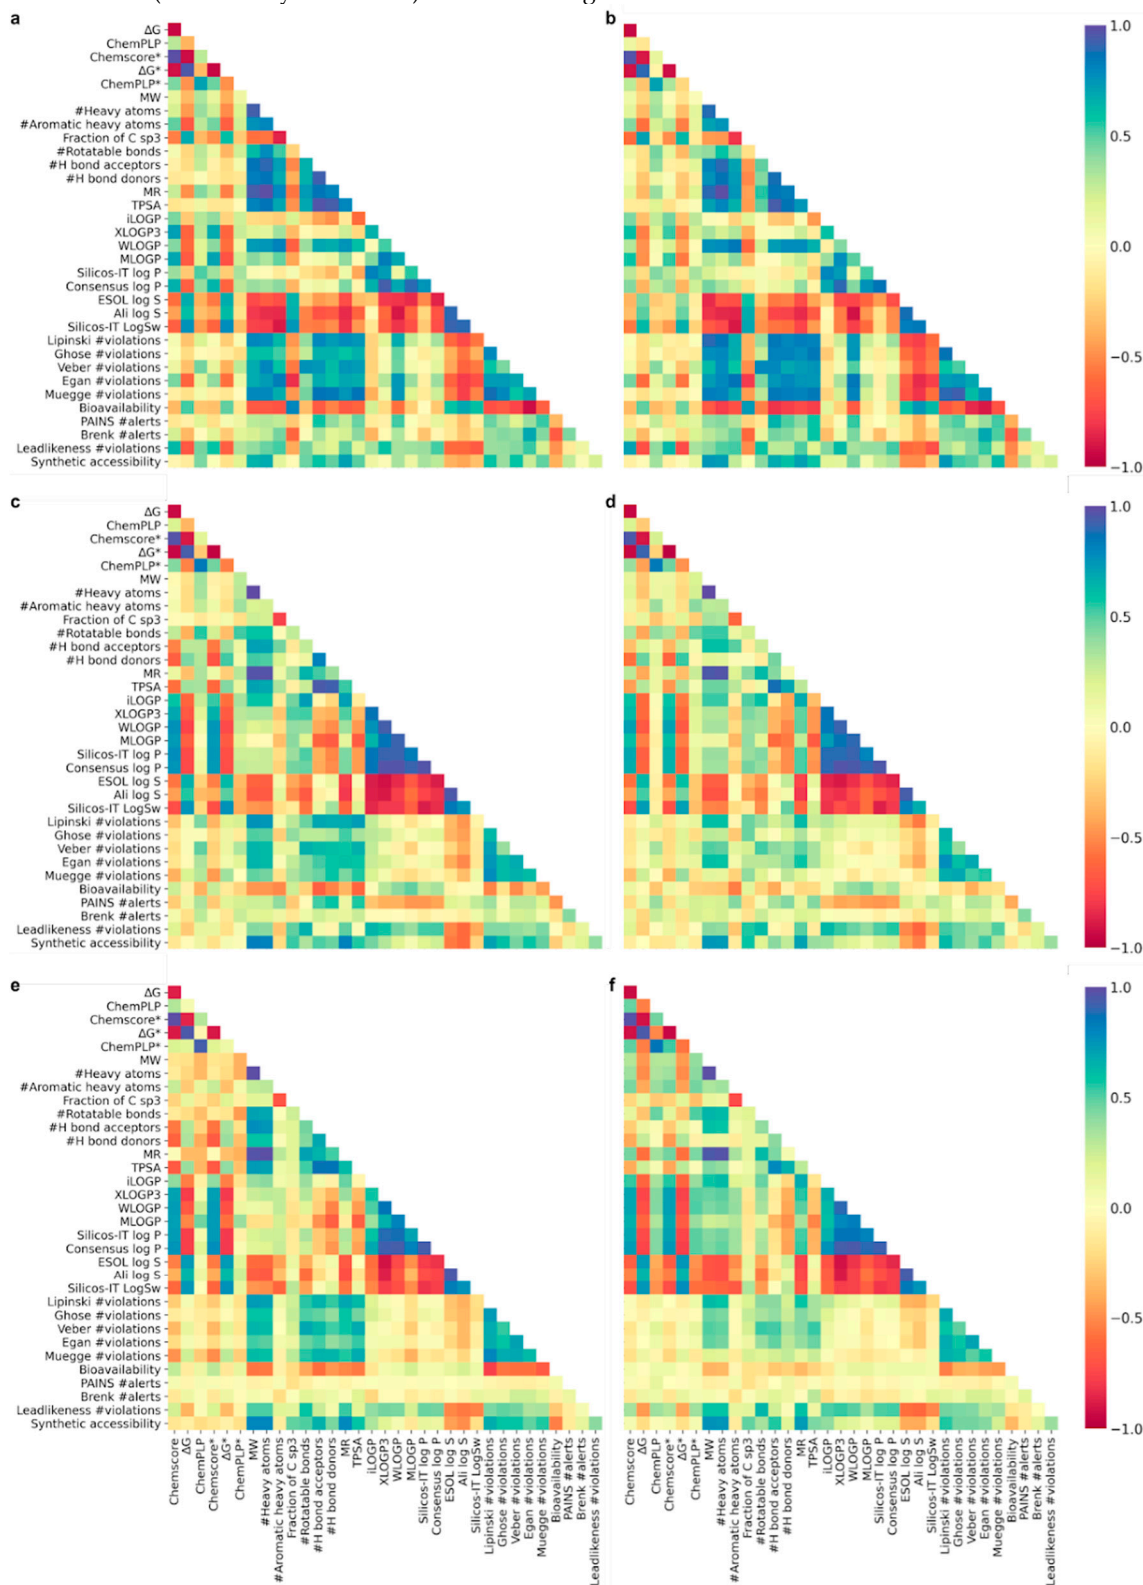

**Figure S4. Interaction networks of the most frequent residues interacting with the top 10 hits.** Interaction networks of the most frequent residues from N501 (upper left) and N501Y (lower left) RBD-containing structures interacting with the top 10 hits. The charts on the left only considered RBD residues from 6M17 RBD-ACE2, 6M17, 6XE1, and 7JMP RBDs. On the right, the most frequent RBD and ACE2 residues from 6M17 RBD-ACE2 interacting with the top 10 hits.

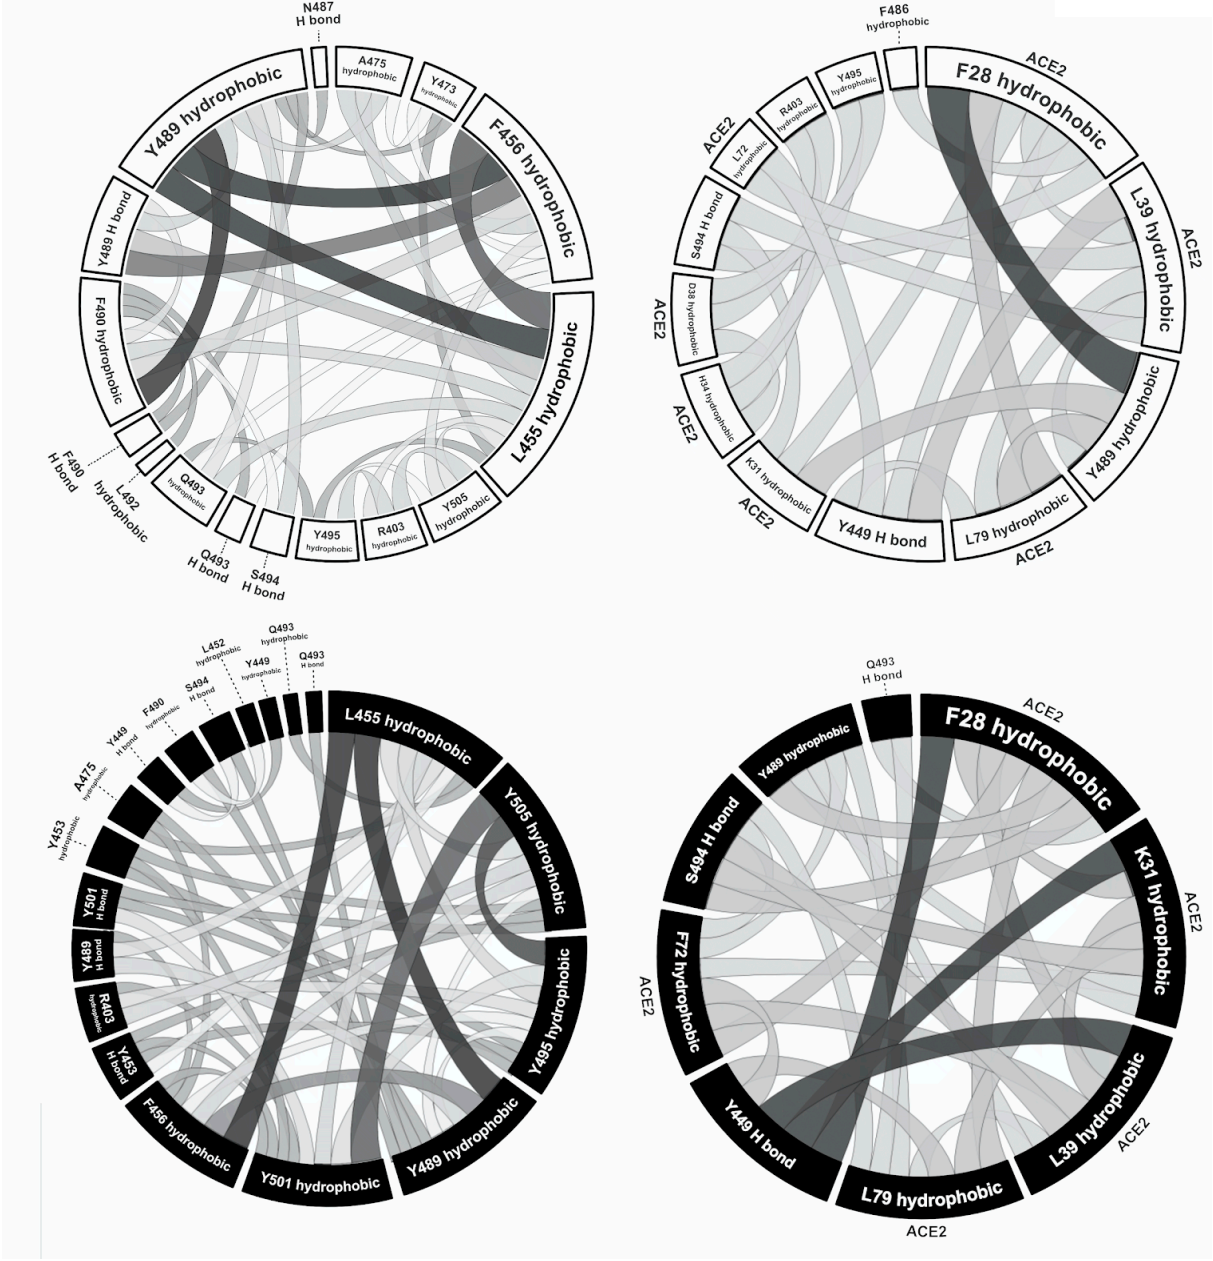



**Figure S5. Interaction profile between N501 or N501Y RBDs with ACE2.** Nested pie charts of RBD (left chart) and ACE2 (right chart) interactions with the hits. White indicates N501 RBDs; black, N501Y. RBD interactions found less than six times were not exhibited in the figure, but aggregated in the "Other" categories. They are the following: forming H bonds, Y505 (4), F456 (3), K417 (3), N501 (3), G502 (2), E484 (2), Q498 (1), A475 (1), G447 (1) and Y495 (1) (N501 RBDs); N487 (5), G502 (5), F490 (3), Y505 (3), Q498 (3), T500 (3), G446 (2), L492 (2), G496 (2), F456 (1), A475 (1), E484 (1), Y495 (1), G447 (1) and F497 (1) (N501Y RBDs); hydrophobic contacts: Y449 (4), F497 (4), E484 (3), Y421 (2), Y453 (2), K417 (1), N487 (1), Y351 (1), K458 (1), I472 (1), G485 V483 and G496 (1) (N501 RBDs); L492 (5), F497 (5), K417 (4), Y473 (2), E484 (2), Y421 (2), F486 (1), N487 (1), K444 (1), S494 (1), P499 (1), T500 (1), G502 (1) and G504 (1) (N501Y RBDs). The data considered protein-ligand interactions between the hits and 6M17 complex, 6M17, 6XE1, and 7JMP RBDs in N501 and N501Y versions.

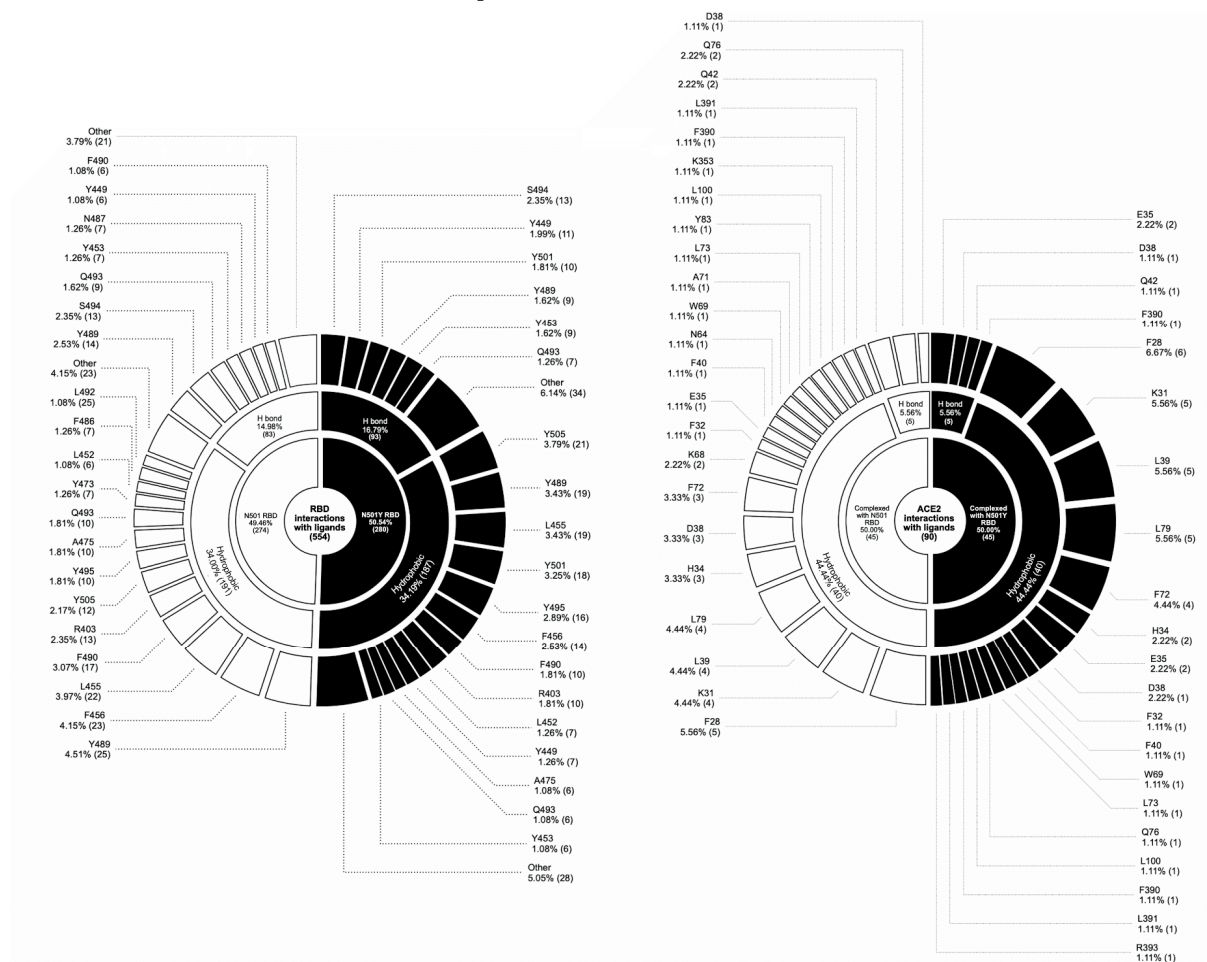

**Figure S6. PDBePISA's main results for RBD sequences from RBD-ACE2 complexes.** The figure highlights certain interfacing (yellow), solvent-accessible (light blue), and inaccessible residues (dark blue). HSDC, residues making hydrogen/disulfide bond, salt bridge or covalent link; ASA, accessible surface area [Å<sup>2</sup>]; BSA, buried surface area [Å<sup>2</sup>]; Δ*G*, solvation energy effect [kcal mol<sup>-1</sup>]; ||||, buried area percentage, one bar per 10%.

| N501 RBD  | HSDC | ASA    | BSA   | Δ <i>G</i> | N501Y RBD | HSDC | ASA    | BSA   | Δ <i>G</i> |
|-----------|------|--------|-------|------------|-----------|------|--------|-------|------------|
| E:VAL 401 |      | 0.12   | 0.00  | 0.00       | E:VAL 401 |      | 0.41   | 0.00  | 0.00       |
| E:ILE 402 |      | 0.00   | 0.00  | 0.00       | E:ILE 402 |      | 0.50   | 0.00  | 0.00       |
| E:ARG 403 |      | 77.37  | 26.57 | -0.59      | E:ARG 403 |      | 77.37  | 17.46 | -0.32      |
| E:GLY 404 |      | 8.08   | 0.00  | 0.00       | E:GLY 404 |      | 8.08   | 0.00  | 0.00       |
| E:GLY 416 |      | 20.00  | 0.00  | 0.00       | E:GLY 416 |      | 28.65  | 0.00  | 0.00       |
| E:LYS 417 |      | 92.54  | 15.42 | 0.07       | E:LYS 417 |      | 84.79  | 6.92  | -0.06      |
| E:ILE 418 |      | 1.06   | 0.00  | 0.00       | E:ILE 418 |      | 5.48   | 0.00  | 0.00       |
| E:LYS 444 |      | 113.80 | 0.00  | 0.00       | E:LYS 444 |      | 124.37 | 0.00  | 0.00       |
| E:VAL 445 |      | 138.87 | 5.93  | -0.01      | E:VAL 445 |      | 127.47 | 1.23  | -0.01      |
| E:GLY 446 |      | 77.07  | 5.99  | -0.07      | E:GLY 446 |      | 72.03  | 4.03  | -0.05      |
| E:GLY 447 |      | 15.17  | 0.00  | 0.00       | E:GLY 447 |      | 14.98  | 0.00  | 0.00       |
| E:ASN 448 |      | 6.92   | 0.00  | 0.00       | E:ASN 448 |      | 14.76  | 0.00  | 0.00       |
| E:TYR 449 | H    | 143.57 | 36.04 | -0.29      | E:TYR 449 | H    | 130.19 | 30.86 | -0.26      |
| E:ASN 450 |      | 115.76 | 0.00  | 0.00       | E:ASN 450 |      | 116.65 | 0.00  | 0.00       |
| E:TYR 451 |      | 13.01  | 0.00  | 0.00       | E:TYR 451 |      | 19.03  | 0.00  | 0.00       |
| E:LEU 452 |      | 53.97  | 0.00  | 0.00       | E:LEU 452 |      | 46.35  | 0.00  | 0.00       |
| E:TYR 453 |      | 35.14  | 24.95 | -0.24      | E:TYR 453 |      | 36.07  | 22.54 | -0.25      |
| E:ARG 454 |      | 6.43   | 0.00  | 0.00       | E:ARG 454 |      | 11.57  | 0.00  | 0.00       |
| E:LEU 455 |      | 50.71  | 50.46 | 0.15       | E:LEU 455 |      | 39.34  | 38.09 | 0.61       |
| E:PHE 456 |      | 55.09  | 43.80 | 0.57       | E:PHE 456 |      | 63.10  | 48.12 | 0.77       |
| E:ARG 457 |      | 51.48  | 0.00  | 0.00       | E:ARG 457 |      | 56.59  | 0.00  | 0.00       |
| E:ILE 472 |      | 50.93  | 0.00  | 0.00       | E:ILE 472 |      | 54.85  | 0.00  | 0.00       |
| E:TYR 473 |      | 60.77  | 17.68 | -0.05      | E:TYR 473 |      | 64.52  | 14.02 | 0.05       |
| E:GLN 474 |      | 79.19  | 0.00  | 0.00       | E:GLN 474 |      | 85.71  | 0.00  | 0.00       |
| E:ALA 475 |      | 26.61  | 19.57 | 0.31       | E:ALA 475 |      | 42.18  | 25.10 | 0.40       |
| E:GLY 476 |      | 60.10  | 29.55 | 0.29       | E:GLY 476 |      | 50.38  | 22.46 | 0.29       |
| E:SER 477 |      | 139.78 | 0.00  | 0.00       | E:SER 477 |      | 121.57 | 0.00  | 0.00       |
| E:GLU 484 |      | 41.59  | 0.00  | 0.00       | E:GLU 484 |      | 47.99  | 0.00  | 0.00       |
| E:GLY 485 |      | 55.46  | 9.03  | -0.09      | E:GLY 485 |      | 61.33  | 6.30  | -0.07      |
| E:PHE 486 |      | 178.44 | 97.32 | 1.08       | E:PHE 486 |      | 171.02 | 77.98 | 1.25       |
| E:ASN 487 |      | 61.20  | 47.39 | -0.23      | E:ASN 487 |      | 49.72  | 31.06 | -0.26      |
| E:CYS 488 |      | 1.33   | 0.00  | 0.00       | E:CYS 488 |      | 2.98   | 0.00  | 0.00       |
| E:TYR 489 | H    | 93.57  | 80.93 | 0.15       | E:TYR 489 | H    | 104.13 | 82.98 | 0.44       |
| E:PHE 490 |      | 93.51  | 0.48  | 0.00       | E:PHE 490 |      | 90.61  | 1.91  | 0.01       |
| E:PRO 491 |      | 3.17   | 0.00  | 0.00       | E:PRO 491 |      | 3.49   | 0.00  | 0.00       |
| E:LEU 492 |      | 19.54  | 0.00  | 0.00       | E:LEU 492 |      | 25.70  | 0.00  | 0.00       |
| E:GLN 493 | H    | 78.08  | 66.16 | -0.18      | E:GLN 493 | H    | 83.52  | 61.87 | -0.45      |
| E:SER 494 |      | 49.60  | 4.42  | -0.05      | E:SER 494 |      | 48.40  | 0.00  | 0.00       |
| E:TYR 495 |      | 37.81  | 17.36 | -0.20      | E:TYR 495 |      | 38.45  | 13.79 | -0.16      |
| E:GLY 496 | H    | 20.37  | 15.63 | 0.00       | E:GLY 496 | H    | 10.38  | 6.09  | 0.05       |
| E:PHE 497 |      | 3.74   | 0.00  | 0.00       | E:PHE 497 |      | 4.99   | 0.00  | 0.00       |
| E:GLN 498 |      | 74.80  | 72.18 | -0.64      | E:GLN 498 |      | 57.10  | 51.70 | -0.63      |
| E:PRO 499 |      | 57.94  | 0.00  | 0.00       | E:PRO 499 |      | 55.31  | 0.00  | 0.00       |
| E:THR 500 | H    | 111.20 | 89.36 | 0.40       | E:THR 500 | H    | 120.69 | 84.38 | 0.29       |
| E:ASN 501 | H    | 45.37  | 36.76 | -0.13      | E:TYR 501 |      | 72.19  | 65.00 | 0.31       |
| E:GLY 502 | H    | 43.11  | 39.25 | 0.27       | E:GLY 502 | H    | 48.14  | 36.43 | 0.30       |
| E:VAL 503 |      | 120.97 | 29.08 | 0.02       | E:VAL 503 |      | 108.11 | 13.68 | 0.12       |
| E:GLY 504 |      | 32.63  | 1.46  | 0.00       | E:GLY 504 |      | 26.78  | 0.00  | 0.00       |
| E:TYR 505 | H    | 110.62 | 78.46 | 0.47       | E:TYR 505 | H    | 112.78 | 74.87 | 0.53       |
| E:GLN 506 |      | 23.54  | 0.00  | 0.00       | E:GLN 506 |      | 26.77  | 0.00  | 0.00       |
| E:PRO 507 |      | 0.00   | 0.00  | 0.00       | E:PRO 507 |      | 1.65   | 0.00  | 0.00       |
| E:TYR 508 |      | 30.59  | 0.00  | 0.00       | E:TYR 508 |      | 28.18  | 0.00  | 0.00       |

**Figure S7. Comparison between N501 and N501Y RBDs in complex with ACE2.** a) Estimation, from the PRODIGY server, of the free energy changes and dissociation constants for N501 and N501Y RBD-ACE2. b) Estimation by PRODIGY of the number of interfacial contacts in N501 and N501Y RBD-ACE2. In this server, the default threshold distance for the number of intermolecular contacts at the interface is 5.5 Å. c) Results from the HyPPI Prediction server (proportions of transient complexes to crystal artifacts for N501 and N501Y RBD-ACE2)

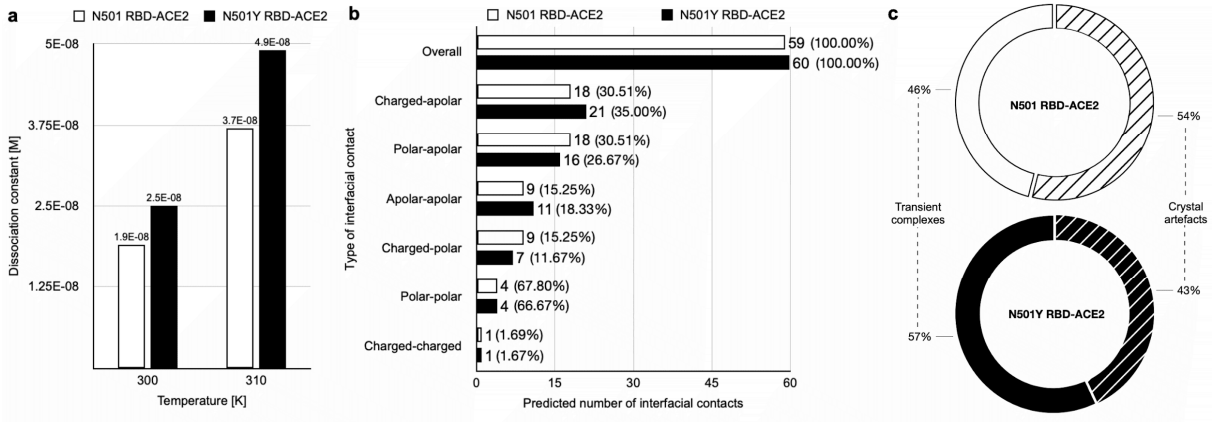

|                    |                    |
|--------------------|--------------------|
| <p><b>c11</b></p>  | <p><b>c12</b></p>  |
| <p><b>c19</b></p>  | <p><b>n29</b></p>  |
| <p><b>n67</b></p>  | <p><b>n96</b></p>  |
| <p><b>n115</b></p> | <p><b>s131</b></p> |
| <p><b>s422</b></p> | <p><b>s443</b></p> |



**Figure S9. Associations between pathways and the studied compounds.** The heatmap shows how likely a pathway (x-axis number-coded as in the PathwayMap server) is associated with a compound from a set (y-axis number-coded with the indexes assigned to the ligands). 1.0, Global and overview maps; 1.1, Carbohydrate metabolism; 1.2, Energy metabolism; 1.3, Lipid metabolism; 1.4, Nucleotide metabolism; 1.5, Amino acid metabolism; 1.6, Metabolism of other amino acids; 1.7, Glycan biosynthesis and metabolism; 1.8, Metabolism of cofactors and vitamins; 1.9, Metabolism of terpenoids and polyketides; 1.10, Biosynthesis of other secondary metabolites; 1.11, Xenobiotics biodegradation and metabolism; 2.1, Transcription; 2.2, Translation; 2.3, Folding, sorting and degradation; 2.4, Replication and repair; 3.1, Membrane transport; 3.2, Signal transduction; 3.3, Signaling molecules and interaction; 4.1, Transport and catabolism; 4.2, Cell growth and death; 4.3, Cellular community - eukaryotes; 4.5, Cell motility; 5.1, Immune system; 5.2, Endocrine system; 5.3, Circulatory system; 5.4, Digestive system; 5.5, Excretory system; 5.6, Nervous system; 5.7, Sensory system; 5.8, Development; 5.9, Aging; 5.10, Environmental adaptation; 6.1, Cancers: overview; 6.2, Cancers: specific types; 6.3, Immune diseases; 6.4, Neurodegenerative diseases; 6.5, Substance dependence; 6.6, Cardiovascular diseases; 6.7, Endocrine and metabolic diseases; 6.8, Infectious diseases: bacterial; 6.9, Infectious diseases: viral; 6.10, Infectious diseases: parasitic; 6.12, Drug resistance: antineoplastic. The server was able to run interactive pathway maps for 24 control (<https://playmolecule.com/PathwayMap/job/D956706F>), 124 natural (<https://playmolecule.com/PathwayMap/job/9A3A9D46>), and 489 synthetic ([https://playmolecule.com/PathwayMap/job/61CE80A3#](https://playmolecule.com/PathwayMap/job/61CE80A3#/)) ligands.

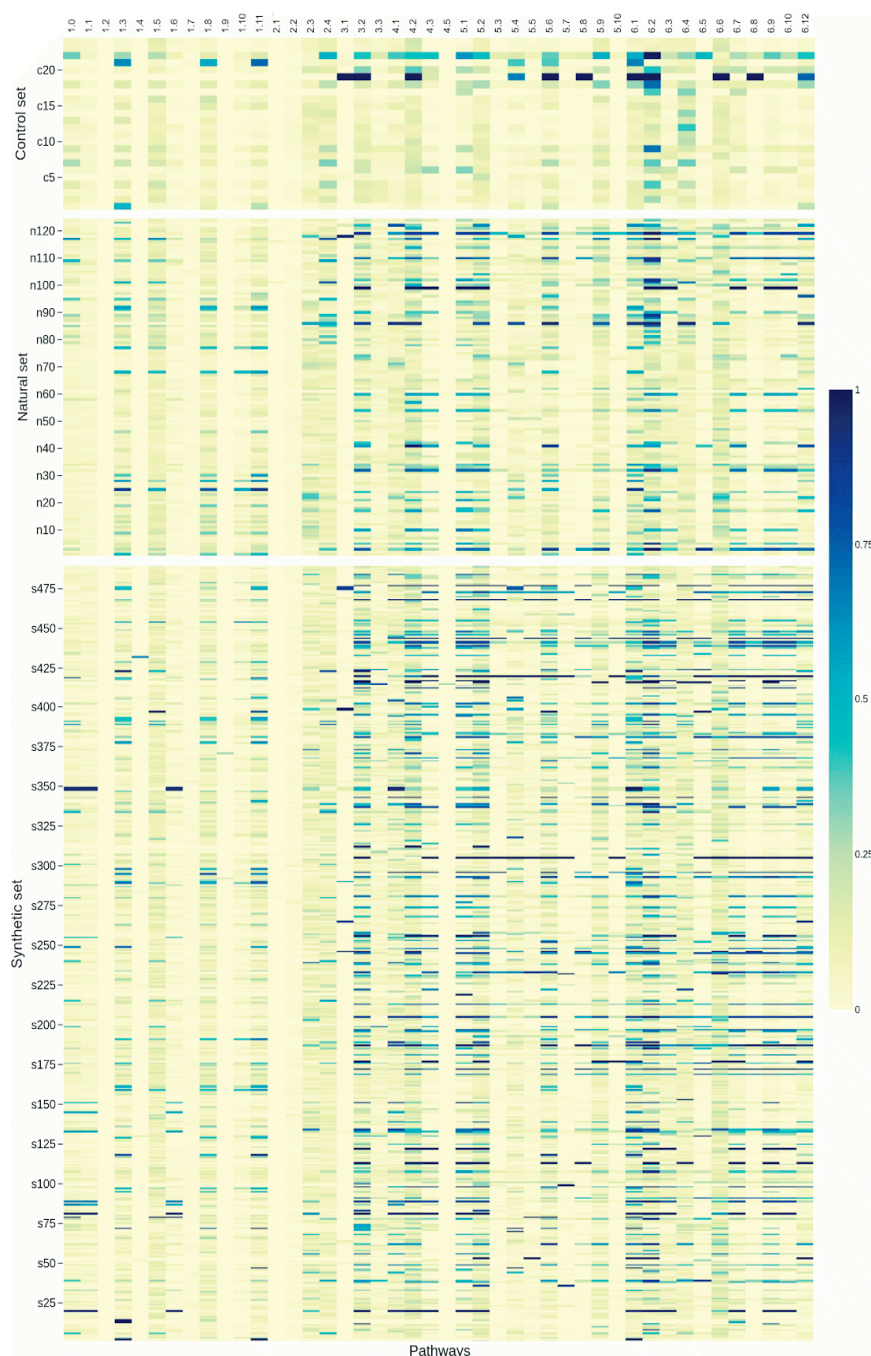

**Figure S10.** Overview of aligned wild-type (N501) RBDs. (a) 45° clockwise horizontal rotation of aligned 6M17, 6XE1 and 7JMP N501 RBDs in surface and (b) cartoon-only representations. (c) Comparison of N501 residues in each structure.

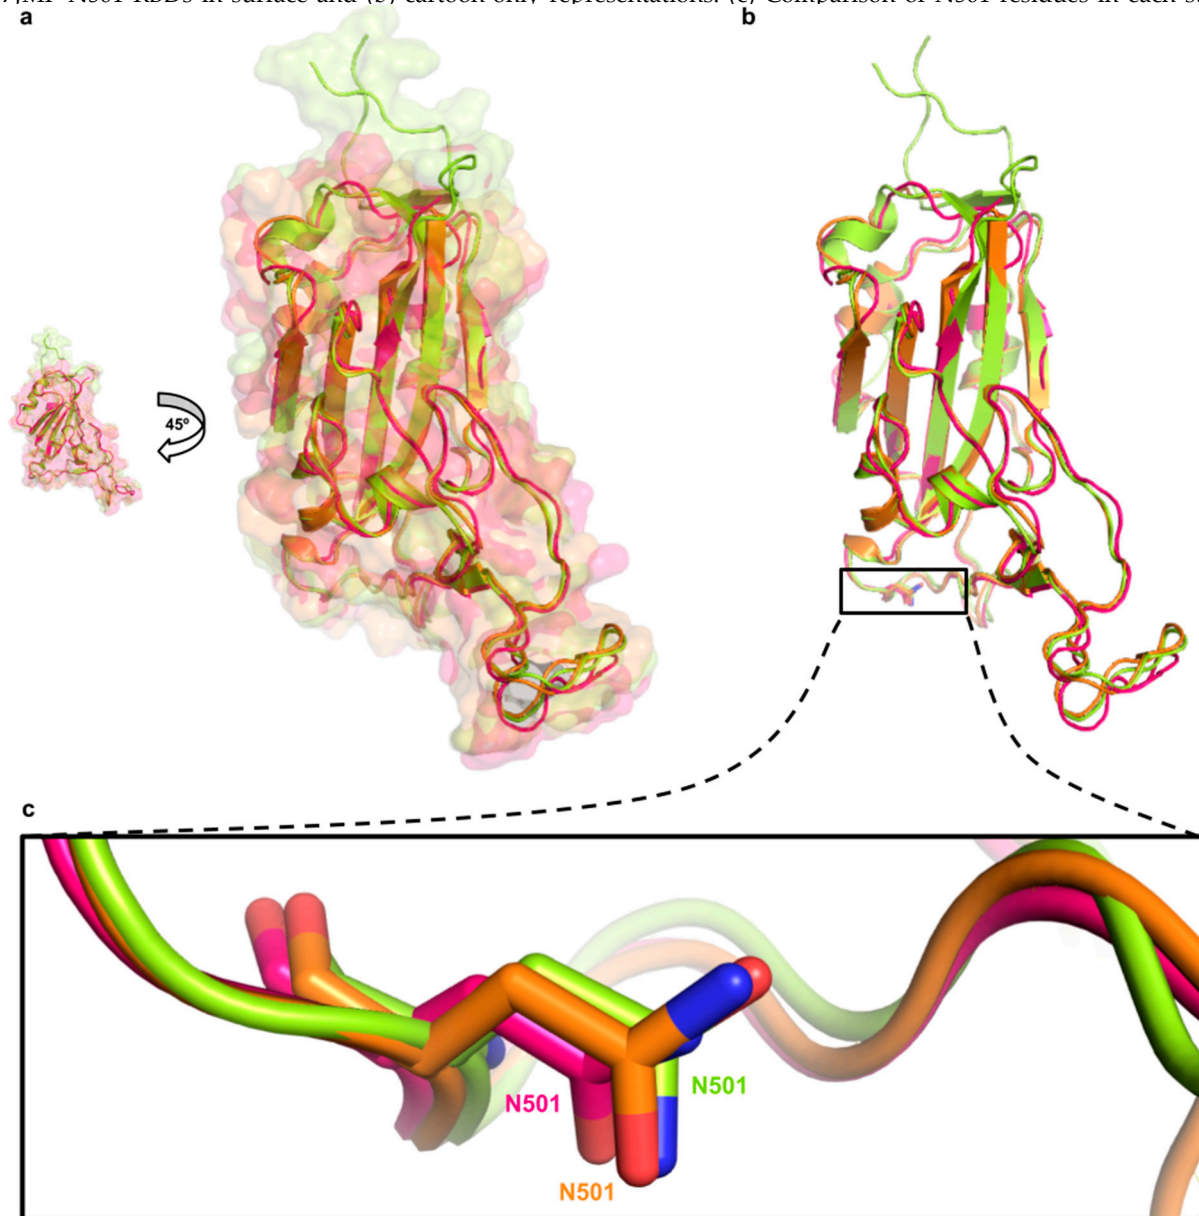

**Figure S11. Overview of aligned and mutated (N501Y) RBDs.** (a) surface and (b) cartoon-only representations of aligned 6M17, 6XE1, 7JMP N501Y RBDs (rotated 45° horizontally and clockwise as in Fig. 3). (c) N501Y comparison among RBDs. (d-f) Comparative between aligned 6M17 (d), 6XE1 (e) and 7JMP (f) N501 and N501Y RBDs.

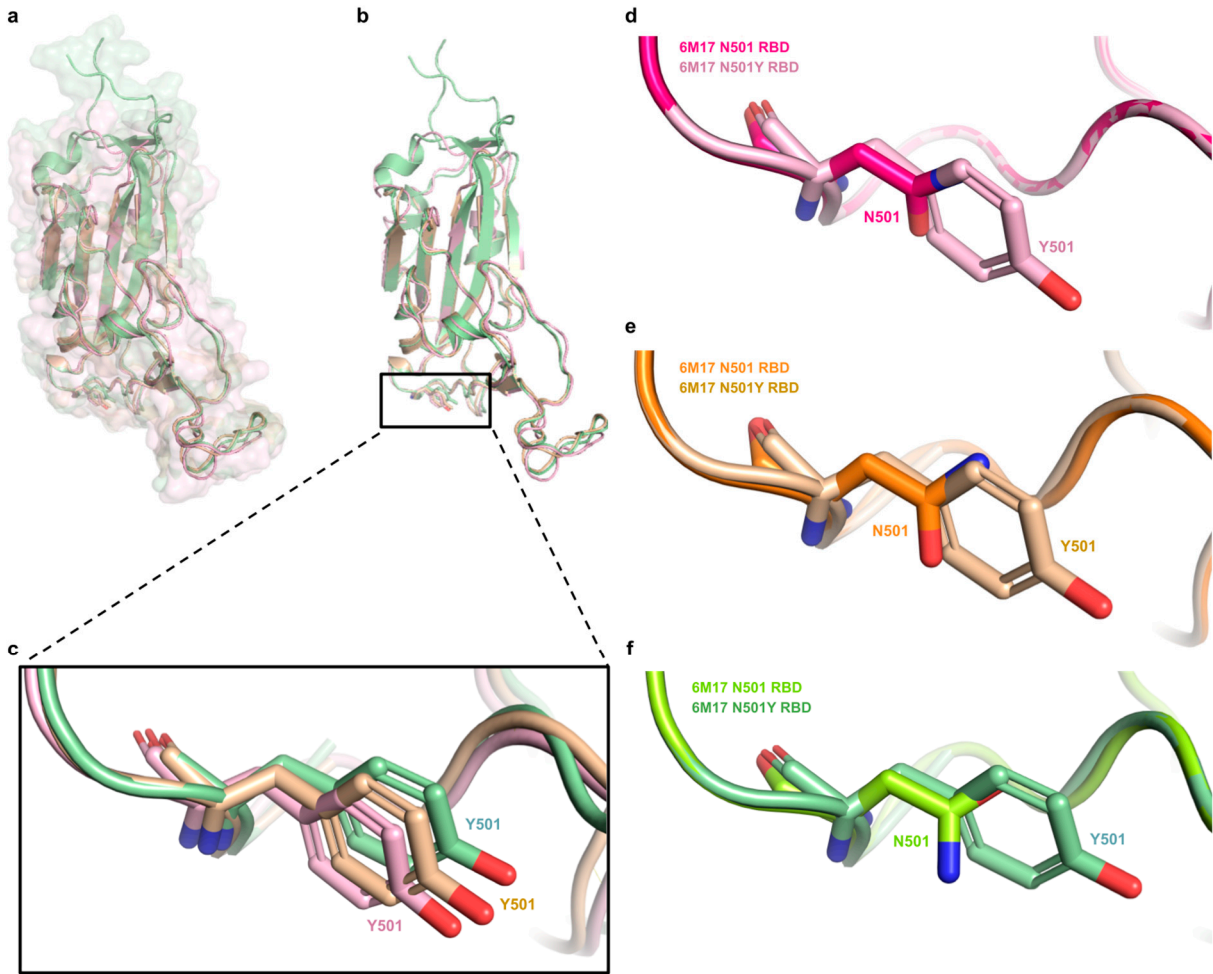

## Supplementary Tables

**Table S1. Docking sites and their key residues targeted for molecular docking.** The two first columns indicate if a residue was considered in the wide and/or specific regions; the other columns refer to whether they were mentioned (black rectangle) or not (blank rectangle) by the listed authors (Supplementary Information)

| Residues by region |          | ANDERSEN <i>et al.</i> (2020) | GULOTTA <i>et al.</i> (2020) | WU <i>et al.</i> (2020) | YAN <i>et al.</i> (2020) |
|--------------------|----------|-------------------------------|------------------------------|-------------------------|--------------------------|
| Wide               | Specific |                               |                              |                         |                          |
| K417               |          |                               |                              |                         |                          |
| G446               | G446     |                               | x                            | x                       |                          |
| Y449               | Y449     |                               | x                            | x                       |                          |
| Y453               |          |                               | x                            | x                       | x                        |
| L455               |          | x                             | x                            | x                       | x                        |
| F456               |          |                               | x                            | x                       | x                        |
| Q474               |          |                               | x                            |                         | x                        |
| A475               |          |                               | x                            | x                       |                          |
| G476               |          |                               | x                            |                         |                          |
| F486               |          | x                             | x                            | x                       | x                        |
| N487               |          |                               | x                            | x                       |                          |
| Y489               |          |                               | x                            | x                       |                          |
| Q493               |          | x                             | x                            | x                       |                          |
| S494               |          | x                             |                              |                         |                          |
| G496               | G496     |                               | x                            | x                       |                          |
| Q498               | Q498     |                               | x                            | x                       | x                        |
| T500               | T500     |                               | x                            | x                       | x                        |
| N501               | N501     | x                             | x                            | x                       | x                        |
| G502               | G502     |                               | x                            | x                       |                          |
| Y505               | Y505     | x                             | x                            | x                       |                          |



**Table S2. Classification and IC<sub>50</sub> values of the control dataset.** The table contains all the control compounds used in the study. For cases where the same compound was assessed in studies under different stages (a preprint and a published paper), the IC<sub>50</sub> value of the published article was stated.

| Index | Classification | IC <sub>50</sub> (μM)   | Reference                               |
|-------|----------------|-------------------------|-----------------------------------------|
| c1    | Inactive       | > 1000                  | Fu <i>et al.</i> , 2020                 |
| c2    | Active         | 4.25                    | Bojadzic; Alcazar; Chen; Buchwald, 2020 |
| c3    | Active         | 113.2                   | Lin <i>et al.</i> , 2020                |
| c4    | Active         | 2.57                    | Bojadzic; Alcazar; Chen; Buchwald, 2020 |
| c5    | Inactive       | > 500                   | Bojadzic; Alcazar; Buchwald, 2020       |
| c6    | Active         | 0.99                    | Bojadzic; Alcazar; Chen; Buchwald, 2020 |
| c7    | Active         | 1.47                    | Bojadzic; Alcazar; Chen; Buchwald, 2020 |
| c8    | Active         | 39.2                    | Fu <i>et al.</i> , 2020                 |
| c9    | Active         | 0.16                    | Bojadzic; Alcazar; Chen; Buchwald, 2020 |
| c10   | Active         | 1.81                    | Bojadzic; Alcazar; Chen; Buchwald, 2020 |
| c11   | Active         | 4.04                    | Bojadzic; Alcazar; Chen; Buchwald, 2020 |
| c12   | Active         | 0.52                    | Bojadzic; Alcazar; Chen; Buchwald, 2020 |
| c13   | Active         | 3.35                    | Bojadzic; Alcazar; Chen; Buchwald, 2020 |
| c14   | Active         | 7.67                    | Bojadzic; Alcazar; Chen; Buchwald, 2020 |
| c15   | Active         | 9.95                    | Bojadzic; Alcazar; Chen; Buchwald, 2020 |
| c16   | Active         | 0.43                    | Bojadzic; Alcazar; Buchwald, 2020       |
| c17   | Active         | 2.25                    | Bojadzic; Alcazar; Chen; Buchwald, 2020 |
| c18   | Inactive       | > 500                   | Bojadzic; Alcazar; Buchwald, 2020       |
| c19   | Active         | 0.13                    | Mulgaonkar <i>et al.</i> , 2020         |
| c20   | Active         | 3.03                    | Bojadzic; Alcazar; Buchwald, 2020       |
| c21   | Inactive       | Exact value unavailable | Fu <i>et al.</i> , 2020                 |
| c22   | Inactive       | > 500                   | Bojadzic; Alcazar; Buchwald, 2020       |
| c23   | Active         | 8.7                     | Fu <i>et al.</i> , 2020                 |
| c24   | Active         | 0.4003                  | Fu <i>et al.</i> , 2020                 |

**Table S3. RMSD values (Å) among the aligned RBD-containing structures.** By default, the RBD-containing structures were aligned to 6M17 RBD, but other alignments are shown in the table above; RMSD values for the 6M17 complex were omitted since it had the same RBD as in 6M17 RBD.

| RMSD |       | 6M17  |       | 6XE1  |       | 7JMP  |       |
|------|-------|-------|-------|-------|-------|-------|-------|
|      |       | N501  | N501Y | N501  | N501Y | N501  | N501Y |
| 6M17 | N501  | 0.000 | 0.000 | 0.821 | 0.831 | 0.852 | 0.855 |
|      | N501Y |       | 0.000 | 0.820 | 0.821 | 0.852 | 0.853 |
| 6XE1 | N501  |       |       | 0.000 | 0.001 | 0.372 | 0.375 |
|      | N501Y |       |       |       | 0.000 | 0.373 | 0.372 |
| 7JMP | N501  |       |       |       |       | 0.000 | 0.000 |
|      | N501Y |       |       |       |       |       | 0.000 |

**Table S4. P-values for paired Wilcoxon two-tailed test to compare docking results according to RBD regions (wide ≠ specific) and versions (N501 ≠ N501Y).** Wide and specific regions are compared to check for significant differences between their main docking results, according to each dataset and their RBD version (N501 or N501Y). Similarly, N501 and N501Y RBDs are compared, according to the datasets and their RBD regions (wide or specific).

| RBD comparison            | Dataset   | RBD version or region | Chemscore              | ΔG                     | ChemPLP                |
|---------------------------|-----------|-----------------------|------------------------|------------------------|------------------------|
| Wide and specific regions | Control   | N501                  | $1.94 \times 10^{-5}$  | $1.94 \times 10^{-5}$  | $1.37 \times 10^{-4}$  |
|                           |           | N501Y                 | $2.49 \times 10^{-2}$  | $8.22 \times 10^{-3}$  | 0.966                  |
|                           | Natural   | N501                  | $7.75 \times 10^{-22}$ | $2.52 \times 10^{-21}$ | $2.54 \times 10^{-19}$ |
|                           |           | N501Y                 | $2.29 \times 10^{-20}$ | $3.89 \times 10^{-14}$ | $4.38 \times 10^{-22}$ |
|                           | Synthetic | N501                  | $5.80 \times 10^{-81}$ | $2.92 \times 10^{-73}$ | $7.32 \times 10^{-39}$ |
|                           |           | N501Y                 | $1.16 \times 10^{-77}$ | $4.81 \times 10^{-61}$ | $2.24 \times 10^{-47}$ |
| N501 and N501Y            | Control   | Wide                  | $5.28 \times 10^{-5}$  | $1.93 \times 10^{-3}$  | $4.09 \times 10^{-3}$  |
|                           |           | Specific              | $1.94 \times 10^{-5}$  | $2.51 \times 10^{-5}$  | $2.21 \times 10^{-5}$  |
|                           | Natural   | Wide                  | $1.89 \times 10^{-19}$ | $8.78 \times 10^{-17}$ | $5.33 \times 10^{-15}$ |
|                           |           | Specific              | $5.32 \times 10^{-22}$ | $2.11 \times 10^{-21}$ | $2.74 \times 10^{-18}$ |
|                           | Synthetic | Wide                  | $9.21 \times 10^{-69}$ | $1.07 \times 10^{-52}$ | $2.26 \times 10^{-52}$ |
|                           |           | Specific              | $4.06 \times 10^{-76}$ | $4.63 \times 10^{-70}$ | $6.46 \times 10^{-40}$ |

**Table S5. P-values for paired Wilcoxon one-tailed test to compare docking results in RBD regions (wide > specific) and versions (N501 > N501Y).** Docking regions are compared to check whether the wide region has significantly superior docking results, according to each dataset and their RBD version (N501 or N501Y). Similarly, RBD versions are compared, checking whether the N501 region has significantly better results than N501Y RBDs, according to the datasets and their RBD regions (wide or specific). Since the higher the Chemscore and ChemPLP scores and the lower the  $\Delta G$  values, the more favorable the results,  $\Delta G$  values were multiplied by  $-1$  to be correctly interpreted in the Python program.

| RBD comparison            | Dataset   | RBD version or region | Chemscore              | $\Delta G$             | ChemPLP                |
|---------------------------|-----------|-----------------------|------------------------|------------------------|------------------------|
| Wide and specific regions | Control   | N501                  | $9.71 \times 10^{-6}$  | $9.70 \times 10^{-6}$  | $6.83 \times 10^{-5}$  |
|                           |           | N501Y                 | $1.25 \times 10^{-2}$  | $4.11 \times 10^{-3}$  | 0.483                  |
|                           | Natural   | N501                  | $3.88 \times 10^{-22}$ | $1.26 \times 10^{-21}$ | $1.27 \times 10^{-19}$ |
|                           |           | N501Y                 | $1.15 \times 10^{-20}$ | $1.95 \times 10^{-14}$ | $2.19 \times 10^{-22}$ |
|                           | Synthetic | N501                  | $2.90 \times 10^{-81}$ | $1.46 \times 10^{-73}$ | 1.00                   |
|                           |           | N501Y                 | $5.80 \times 10^{-78}$ | $2.40 \times 10^{-61}$ | $1.12 \times 10^{-47}$ |
| N501 and N501Y            | Control   | Wide                  | 1.00                   | 1.00                   | 1.00                   |
|                           |           | Specific              | 1.00                   | 1.00                   | 1.00                   |
|                           | Natural   | Wide                  | 1.00                   | 1.00                   | 1.00                   |
|                           |           | Specific              | 1.00                   | 1.00                   | $1.37 \times 10^{-18}$ |
|                           | Synthetic | Wide                  | 1.00                   | 1.00                   | 1.00                   |
|                           |           | Specific              | 1.00                   | 1.00                   | $3.23 \times 10^{-40}$ |

**Table S6. P-values for paired Wilcoxon one-tailed test to compare docking results in RBD regions (wide < specific) and versions (N501 < N501Y).** P-values for paired Wilcoxon one-tailed test to compare docking results in RBD regions (wide < specific) and versions (N501 < N501Y). Docking regions are compared to check whether the wide region has significantly inferior docking results, according to each dataset and their RBD version (N501 or N501Y). Similarly, RBD versions are compared, checking whether the N501 region has significantly worse results than N501Y RBDs, according to the datasets and their RBD regions (wide or specific). Since the higher the Chemscore and ChemPLP scores and the lower the  $\Delta G$  values, the more favorable the results,  $\Delta G$  values were multiplied by  $-1$  to be correctly interpreted in the Python program.

| RBD comparison            | Dataset   | RBD version or region | Chemscore              | $\Delta G$             | ChemPLP                |
|---------------------------|-----------|-----------------------|------------------------|------------------------|------------------------|
| Wide and specific regions | Control   | N501                  | 1.00                   | 1.00                   | 1.00                   |
|                           |           | N501Y                 | 0.988                  | 0.996                  | 0.528                  |
|                           | Natural   | N501                  | 1.00                   | 1.00                   | 1.00                   |
|                           |           | N501Y                 | 1.00                   | 1.00                   | 1.00                   |
|                           | Synthetic | N501                  | 1.00                   | 1.00                   | $3.66 \times 10^{-39}$ |
|                           |           | N501Y                 | 1.00                   | 1.00                   | 1.00                   |
| N501 and N501Y            | Control   | Wide                  | $2.64 \times 10^{-5}$  | $9.67 \times 10^{-4}$  | $2.04 \times 10^{-3}$  |
|                           |           | Specific              | $9.70 \times 10^{-6}$  | $1.25 \times 10^{-5}$  | $1.10 \times 10^{-5}$  |
|                           | Natural   | Wide                  | $9.43 \times 10^{-20}$ | $4.39 \times 10^{-17}$ | $2.66 \times 10^{-15}$ |
|                           |           | Specific              | $2.66 \times 10^{-22}$ | $1.05 \times 10^{-21}$ | 1.00                   |
|                           | Synthetic | Wide                  | $4.60 \times 10^{-69}$ | $5.36 \times 10^{-53}$ | $1.13 \times 10^{-52}$ |
|                           |           | Specific              | $2.03 \times 10^{-76}$ | $2.31 \times 10^{-70}$ | 1.00                   |



**Table S7. Top 10 ranked molecules in docking simulations.** Their IUPAC or common names (when applicable) are indicated below.

|             |                                                                                                                                                                                                                                                                                   |
|-------------|-----------------------------------------------------------------------------------------------------------------------------------------------------------------------------------------------------------------------------------------------------------------------------------|
| <i>c11</i>  | 4-hydroxy-8-(4'-(4-(methoxycarbonyl)benzamide)-[1,1'-biphenyl]-4-carboxamide)naphthalene-2-sulfonic acid (DRI-C2204745)                                                                                                                                                           |
| <i>c12</i>  | 5-(4'-(4-nitrobenzamide)-[1,1'-biphenyl]-4-carboxamido)naphthalene-2-sulfonic acid (DRI-C23041)                                                                                                                                                                                   |
| <i>c19</i>  | 4-[(4-methylpiperazin-1-yl)methyl]-N-[4-methyl-3-[(4-pyridin-3-yl)pyrimidin-2-yl]amino]phenyl]benzamide (imatinib)                                                                                                                                                                |
| <i>n29</i>  | ( <i>E</i> )-3-phenyl-1-(4-phenylphenyl)prop-2-en-1-one                                                                                                                                                                                                                           |
| <i>n67</i>  | 2-methyl-4-(octadec-17-en-10-yn-1-yl)-5-oxotetrahydrofuran-3-yl acetate                                                                                                                                                                                                           |
| <i>n96</i>  | (9 <i>E</i> )-heptadeca-1,9-dien-4,6-diyn-3-ol (falcarinol)                                                                                                                                                                                                                       |
| <i>n115</i> | hentriacontane-16-one (palmitone)                                                                                                                                                                                                                                                 |
| <i>s131</i> | 2-[(2 <i>E</i> ,6 <i>E</i> ,10 <i>E</i> ,14 <i>E</i> ,18 <i>E</i> ,22 <i>E</i> ,26 <i>E</i> ,30 <i>E</i> ,34 <i>E</i> )-3,7,11,15,19,23,27,31,35,39-decamethyltetraconta-2,6,10,14,18,22,26,30,34,38-decaenyl]-5,6-dimethoxy-3-methylcyclohexa-2,5-diene-1,4-dione (coenzyme Q10) |
| <i>s422</i> | 3-cyclopentyl-N-[2-(dimethylamino)ethyl]-N-[[4-[4-[(2-phenylethylamino)methyl]phenyl]phenyl]methyl]propanamide (SB-699551)                                                                                                                                                        |
| <i>s443</i> | (1-hydroxy-3-octadecanoyloxypropan-2-yl) (5 <i>Z</i> ,8 <i>Z</i> ,11 <i>Z</i> ,14 <i>Z</i> )-icosa-5,8,11,14-tetraenoate (1-stearoyl-2-arachidonoylglycerol)                                                                                                                      |

**Table S8. Comparison of N501 and N501Y RBD-ACE2 complexes by PDBePISA.** In these circumstances, the solvation energies displayed by PDBePISA should not be considered in absolute values, because the structures analyzed contain the RBD, but not entirely the Spike protein, to which a portion of the RBD would be attached and not exposed (as well as a part of ACE2, since it is a transmembrane protein). Instead, they should be interpreted qualitatively, comparing two RBDs differing in one residue.

| Evaluation                               |                                           | N501 RBD-ACE2 complex |          | N501Y RBD-ACE2 complex |          |
|------------------------------------------|-------------------------------------------|-----------------------|----------|------------------------|----------|
|                                          |                                           | RBD                   | ACE2     | RBD                    | ACE2     |
| Interface                                | Atoms                                     | 95                    | 107      | 87                     | 90       |
|                                          | Residues                                  | 27                    | 27       | 25                     | 24       |
|                                          | Solvent-accessible area [Å <sup>2</sup> ] | 961.2                 | 901.6    | 838.9                  | 810.6    |
| Solvation energy [kJ mol <sup>-1</sup> ] | Isolated structure                        | -701.7                | -3,319.2 | -637.6                 | -3,053.1 |
|                                          | Gain on complex formation                 | -4.2                  | 7.1      | -12.1                  | 0.84     |
|                                          | Average gain                              | -8.8                  | -3.3     | -12.6                  | -9.2     |

**Table S9. Confidence intervals of eMolTox for top ECR-ranked molecules.** ADMET properties predicted by eMolTox for a molecule for a 0.05 significance level  $\alpha$ . Each value represents a confidence interval for an ADMET property of a ligand, which can present either a positive or negative result. Red indicates a concerning characteristic (e.g., positive result as a disruptor of the mitochondrial membrane potential); blue, optimal (e.g., negative result for liver injury); yellow, requiring further analysis; zero values indicate that it wasn't able to return a given property for a particular ligand with  $\alpha \leq 0.05$ . Also, the yellow color for compounds acting as modulators doesn't necessarily infer (a) toxicity, but the risk of a compound losing its potential specificity against RBD if it can act as a modulator of other targets. All the ten ligands had negative results as modulators of cyclooxygenase-2, beta (2 and 3) adrenergic receptors, vascular endothelial growth factor receptors (1 and 2), dopamine D1 receptor, calcitonin gene-related peptide type 1 receptor, receptor protein-tyrosine kinase erbB-2, adenosine A2a receptor, dopamine D2 receptor, glutamate NMDA receptor, androgen receptor, dopamine transporter, serotonin 3a (5-HT3a) receptor, histamine H1 receptor, melatonin receptor 1B, adenosine A2b receptor, beta-1 adrenergic receptor, serotonin 4 (5-HT4) receptor, alpha-1a adrenergic receptor, sigma opioid receptor, adenosine A3 receptor, peroxisome proliferator-activated receptor gamma, delta-opioid receptor, sodium channel protein type IX alpha subunit, norepinephrine transporter, P2X purinoceptor (3 and 7), adenosine A1 receptor, endothelin receptor ET-B, vascular endothelial growth factor receptor and serotonin 7 (5-HT7) receptor, endothelin receptor ET-A.

|                                                     | <i>c11</i> | <i>c12</i> | <i>c19</i> | <i>n29</i> | <i>n67</i> | <i>n96</i> | <i>n115</i> | <i>s131</i> | <i>s422</i> | <i>s443</i> |
|-----------------------------------------------------|------------|------------|------------|------------|------------|------------|-------------|-------------|-------------|-------------|
| BSEP inhibitor                                      | 0.970 (-)  | 0.970 (-)  | 0.988 (+)  | 0.000      | 0.000      | 0.000      | 0.000       | 0.000       | 0.976 (+)   | 0.000       |
| Cytotoxicity in HepG2 cells (8 h)                   | 0.981 (+)  | 0.981 (+)  | 0.000      | 0.000      | 0.000      | 0.000      | 0.964 (+)   | 0.000       | 0.956 (+)   | 0.000       |
| Cytotoxicity in HepG2 cells (16 h)                  | 0.983 (+)  | 0.983 (+)  | 0.000      | 0.000      | 0.000      | 0.000      | 0.971 (+)   | 0.000       | 0.978 (+)   | 0.000       |
| Cytotoxicity in HepG2 cells (24 h)                  | 0.970 (+)  | 0.970 (+)  | 0.000      | 0.000      | 0.000      | 0.000      | 0.000       | 0.000       | 0.981 (+)   | 0.000       |
| Cytotoxicity in HepG2 cells (32 h)                  | 0.951 (+)  | 0.951 (+)  | 0.976 (+)  | 0.000      | 0.000      | 0.000      | 0.000       | 0.000       | 0.965 (+)   | 0.000       |
| Cytotoxicity in HepG2 cells (40 h)                  | 0.000      | 0.000      | 0.984 (+)  | 0.000      | 0.000      | 0.000      | 0.000       | 0.000       | 0.994 (+)   | 0.000       |
| Cytotoxicity in HEK293 cells (8 h)                  | 0.989 (+)  | 0.990 (+)  | 0.000      | 0.000      | 0.000      | 0.951 (+)  | 0.980 (+)   | 0.000       | 0.963 (+)   | 0.000       |
| Cytotoxicity in HEK293 cells (16 h)                 | 0.988 (+)  | 0.988 (+)  | 0.000      | 0.000      | 0.000      | 0.000      | 0.974 (+)   | 0.000       | 0.000       | 0.000       |
| Cytotoxicity in HEK293 cells (24 h)                 | 0.975 (+)  | 0.975 (+)  | 0.000      | 0.000      | 0.000      | 0.962 (+)  | 0.972 (+)   | 0.000       | 0.981 (+)   | 0.000       |
| Cytotoxicity in HEK293 cells (32 h)                 | 0.965 (+)  | 0.966 (+)  | 0.000      | 0.000      | 0.000      | 0.000      | 0.968 (+)   | 0.000       | 0.960 (+)   | 0.000       |
| Cytotoxicity in HEK293 cells (40 h)                 | 0.000      | 0.000      | 0.000      | 0.000      | 0.000      | 0.959 (+)  | 0.958 (+)   | 0.000       | 0.982 (+)   | 0.000       |
| Induce genotoxicity in human embryonic kidney cells | 0.971 (+)  | 0.971 (+)  | 0.000      | 0.983 (+)  | 0.969 (-)  | 0.981 (-)  | 0.973 (-)   | 0.000       | 0.000       | 0.979 (-)   |
| Liver injury                                        | 0.966 (+)  | 0.966 (+)  | 0.996 (+)  | 0.000      | 0.000      | 0.979 (-)  | 0.976 (-)   | 0.000       | 0.000       | 0.975 (-)   |
| Modulator of angiotensin-converting enzyme          | 0.997 (-)  | 0.997 (-)  | 0.993 (-)  | 0.992 (-)  | 0.993 (-)  | 0.993 (-)  | 0.996 (-)   | 0.993 (-)   | 0.996 (-)   | 1.000 (-)   |
| Modulator of angiotensin II type 1 receptor         | 0.993 (-)  | 0.994 (-)  | 0.989 (-)  | 0.996 (-)  | 0.996 (-)  | 0.993 (-)  | 0.999 (-)   | 1.000 (-)   | 0.992 (-)   | 0.996 (-)   |
| Modulator of angiotensin II type 2 receptor         | 0.996 (-)  | 0.989 (-)  | 0.985 (-)  | 0.989 (-)  | 0.997 (-)  | 0.997 (-)  | 0.985 (-)   | 0.000       | 0.980 (-)   | 0.971 (-)   |
| Modulator of muscarinic acetylcholine receptor M2   | 0.983 (-)  | 0.983 (-)  | 0.999 (-)  | 0.999 (-)  | (+) 0.951  | 0.997 (-)  | (+) 0.986   | (+) 0.965   | (+) 0.969   | (+) 0.994   |
| Modulator of Glucocorticoid receptor                | 0.999 (-)  | 0.999 (-)  | 0.999 (-)  | 0.996 (-)  | 0.997 (-)  | 0.998 (-)  | 0.993 (-)   | 0.000       | 0.995 (-)   | 0.995 (-)   |
| Modulator of Platelet activating factor receptor    | 0.987 (-)  | 0.996 (-)  | 0.982 (+)  | 0.990 (-)  | 0.972 (-)  | 0.996 (-)  | 0.983 (-)   | 0.964 (-)   | 0.973 (+)   | 0.970 (-)   |
| Modulator of Serotonin 2c (5-HT2c) receptor         | 0.996 (-)  | 0.996 (-)  | 0.993 (-)  | 0.992 (-)  | 0.992 (-)  | 0.995 (-)  | 0.989 (-)   | 0.993 (-)   | 0.990 (+)   | 0.997 (-)   |
| Modulator of Alpha-1b adrenergic receptor           | 0.993 (-)  | 0.995 (-)  | 0.997 (-)  | 0.996 (-)  | 0.999 (-)  | 0.996 (-)  | 0.993 (-)   | 0.982 (-)   | 0.988 (+)   | 0.999 (-)   |
| Modulator of Muscarinic                             | 0.959 (-)  | 0.967 (-)  | 0.991 (-)  | 0.966 (-)  | 0.959 (+)  | 0.965 (-)  | 0.988 (+)   | 0.987 (+)   | 0.960 (-)   | 0.988 (+)   |

|                                                   |           |           |           |           |           |           |           |           |           |           |
|---------------------------------------------------|-----------|-----------|-----------|-----------|-----------|-----------|-----------|-----------|-----------|-----------|
| acetylcholine receptor M4                         |           |           |           |           |           |           |           |           |           |           |
| Modulator of Serotonin 1b (5-HT1b) receptor       | 0.973 (-) | 0.974 (-) | 0.972 (+) | 0.986 (-) | 0.978 (-) | 0.967 (-) | 0.957 (-) | 0.969 (-) | 0.994 (+) | 0.982 (-) |
| Modulator of Muscarinic acetylcholine receptor M3 | 0.974 (-) | 0.974 (-) | 0.999 (-) | 0.994 (-) | 0.961 (-) | 0.976 (-) | 0.978 (+) | 0.962 (+) | 0.981 (+) | 0.973 (+) |
| Modulator of Serotonin 1a (5-HT1a) receptor       | 0.993 (-) | 0.992 (-) | 0.988 (-) | 0.999 (-) | 1.000 (-) | 1.000 (-) | 0.995 (-) | 0.994 (-) | 0.984 (+) | 1.000 (-) |
| Modulator of Serotonin 2a (5-HT2a) receptor       | 0.985 (-) | 0.984 (-) | 0.987 (+) | 0.994 (-) | 0.991 (-) | 0.983 (-) | 0.984 (-) | 0.985 (-) | 0.994 (+) | 0.997 (+) |
| Modulator of Acetylcholinesterase                 | 0.967 (+) | 0.967 (+) | 0.992 (-) | 0.999 (-) | 0.981 (-) | 0.992 (-) | 0.974 (-) | 0.000     | 0.982 (+) | 0.961 (+) |
| Modulator of HERG                                 | 0.987 (-) | 0.987 (-) | 0.978 (-) | 0.978 (-) | 0.968 (-) | 0.968 (-) | 0.000     | 0.000     | 0.973 (+) | 0.975 (-) |
| PDGFRA modulator                                  | (-) 0.976 | (-) 0.974 | (+) 0.999 | (-) 0.970 | (-) 0.983 | (-) 0.980 | (-) 0.975 | (-) 0.970 | (-) 0.979 | (-) 0.978 |
| PDGFRB modulator                                  | (-) 0.981 | (-) 0.981 | (+) 0.999 | (-) 0.984 | (-) 0.986 | (-) 0.996 | (-) 0.989 | (-) 0.978 | (-) 0.969 | (-) 0.982 |

## Supplementary Methods

### Free energy calculations

Once molecular dynamics simulations and sub-trajectories with the highest stability were obtained, we estimated the binding free energy from MM-GBSA (Molecular mechanics with generalized Born and surface area solvation)<sup>60,61</sup>. Amber18 was used to perform MM-GBSA calculations (equation 1)

$$\Delta G = G_C - G_R - G_I \quad (1)$$

where  $G_C$  is the energy of the complex,  $G_R$  is the energy of the receptor and  $G_I$  describes the energy of the inhibitor. Frames from 1 to 500 of the most stable sub-trajectories were used (for all cases, the 150 ns trajectories were used). Applying this method made it possible to estimate the binding free energy of the complexes formed between RBD (with and without the N501Y mutation) and the candidate inhibitors under study.

### Free energy decomposition

The free energy values were calculated from the residues' decomposition to understand better the interaction between amino acid residues (equation 2) and the compounds under study.

$$\Delta G_{IR} = \Delta G_{vdW} - \Delta G_{Ele} - \Delta G_{GB} \quad (2)$$

$\Delta G_{IR}$  is the free energy of amino acid residues;  $\Delta G_{vdW}$  is the energy of van der Waals;  $\Delta G_{Ele}$  is the electrostatic energy and  $\Delta G_{GB}$  is the energy of solvation calculated from the generalized Born method. This approximation was performed using the Amber18 program, with a molarity concentration of 0.100 M. The results were used to evaluate the energy behavior of RBD residues in the presence of the potential inhibitors.



## Supplementary Discussion

### H bonds and hydrophobic interactions in the protein-ligand complexes

Interactions involving various tyrosine residues were found between RBD-containing structures and the selected hits. The most frequent interacting residue was Y489, establishing H bonds and predominating hydrophobic contact, particularly for the N501 RBD-containing structures. However, the overall number of interactions was slightly higher in N501Y RBDs, which is worth highlighting Y505 hydrophobic contacts and S494 H bonds. When comparing the total number of interactions of residue 501 among RBD N501 and N501Y RBD-containing structures, the quantity increased more than 9-fold from the former to the latter. In addition, N501 did not interact via hydrophobic interactions, whereas Y501 did, besides interacting through H bonds.

ACE2 interacted hydrophobically with the hits mainly through phenylalanine and leucine residues, and through H bonds by glutamines. F28 was the most frequent residue of ACE2, forming more hydrophobic contacts with the hits when complexed with N501Y RBD. Most interactions were hydrophobic, and their proportions were equal between ACE2s complexed with N501 or N501Y RBDs, albeit the absolute number of interactions by the main interacting residues increased in N501Y RBD-ACE2. In addition, E35 H bonds were absent in N501 RBD-ACE2 but prevailed in N501Y RBD-ACE2, whereas the Q76 H bond was not identified anymore (Fig. S6).

### H bonds and hydrophobic interactions in the RBD-ACE2 complexes

From the PDBePISA server, the solvent-accessible interface area for RBD-ACE2 was found to be smaller in N501Y than in N501 RBD. Despite that, we can note interesting issues: (1) residues labeled as inaccessible become accessible; (2) the solvation energy gain related to the complex formation and its average gain become more favorable in the complex with the mutated RBD (Table S7); (3) concomitantly, Y501 presented 59.11% more accessible surface area (ASA, a total of 72.19 Å<sup>2</sup>) and 76.82% extra buried surface area (BSA, 65.00 Å<sup>2</sup> in total ) than N501. A larger residue ASA could increase RBD-ACE2 interactions; a greater BSA could support immune evasion.

The shortest H bond distance at the RBD-ACE2 complex, identified in the server, was 2.58 Å for the O atom in Y489 (RBD) and OH in E27 (ACE2) N501 and N501Y RBDs. Y489 was substantially involved in H bonds and hydrophobic protein-ligand interactions. In addition, nine H bonds between N501 RBD and ACE2 were observed, while eight were found between N501Y RBD and ACE2; the H bond detected between N501 and Y41 was not found between Y501 and ACE2 atoms. However, from the structure visualization using PyMOL, nine protein-protein polar contacts were observed in both RBD versions complexed with ACE2 — including Y501 and K353 in the mutated case, forming H bonds with 1.77 and 2.38 Å of distance, respectively, whereas an H bond between N501 and K353 was also detected (2.33 Å) (Fig. S7).

From the PRODIGY server, we assessed the estimated free energy changes ( $\Delta G$ ) and the dissociation constants ( $k_a$ ) for N501 and N501Y RBDs complexed with ACE2.  $\Delta G$  values were considerably similar (−43.93 and −43.51 kJ mol<sup>−1</sup>, respectively);  $k_a$  was smaller for N501Y RBD-ACE2. This suggests that the complex formation remained energetically favorable, with the faster association and slower dissociation rates between RBD-ACE2.

The overall predicted number of interfacial contacts was similar, but N501Y RBD-ACE2 had an extra interfacial contact; per property, charged-apolar and apolar-apolar interactions prevailed in both but increased in N501Y RBD-ACE2. However, from N501 to N501Y RBD-ACE2, there were fewer charged-polar and polar-polar contacts, whereas the charged-charged and polar-polar contacts remained constant. Thus, there was an increase in apolar-related contacts and a decrease in polar-related ones.

The HyPPI Prediction server gave us the proportions of transient complexes to crystal artifacts for N501 and N501Y RBD-ACE2 complexes. Notably, there was an increase in the stabilization of the N501Y RBD-ACE2 transient complex, which implies more biologically relevant interactions (Fig. S8).

## Supplementary Notes

The following calculations were performed to quantify the total number of docking poses:

8 structures  $\times$  2 sites  $\times$  637 compounds  $\times$  100 runs = 1,019,200 poses.

8 structures  $\times$  most promising site  $\times$  10 hits  $\times$  25 repetitions  $\times$  100 runs = 200,000 poses.

Summing the number of docking poses above, 1,219,200 poses were generated.

Additionally, ten other ligands were evaluated after this study, resulting in a total of 1,235,200 poses, but such molecules were not further investigated since they did not surpass the other top-scoring compounds.

## Supplementary References

57. Fu, W.; Chen, Y.; Wang, K.; Hettinghouse, A.; Hu, W.; Wang, J.-Q.; Lei, Z.-N.; Chen, Z.-S.; Stapleford, K.A.; Liu, C.-J. Repurposing FDA-approved drugs for SARS-CoV-2 through an ELISA-based screening for the inhibition of RBD/ACE2 interaction. *Protein Cell* **2021**, *12*, 586–591.
58. Bojadzic, D.; Alcazar, O.; Buchwald, P. Methylene Blue Inhibits the SARS-CoV-2 spike–ACE2 Protein-Protein Interaction—a Mechanism that can Contribute to its Antiviral Activity Against COVID-19. *Frontiers in Pharmacology* **2021**, *11*, 600372.
59. Lin, C.; Li, Y.; Zhang, Y.; Liu, Z.; Mu, X.; Gu, C.; Liu, J.; Li, Y.; Li, G.; Chen, J. Ceftazidime Is a Potential Drug to Inhibit SARS-CoV-2 Infection In Vitro by Blocking Spike Protein-ACE2 Interaction. Available online: <https://biorxiv.org/content/10.1101/2020.09.14.295956v1.full> (accessed on 20 February 2021).
60. Mulgaonkar, N.S.; Wang, H.; Mallawarachchi, S.; Růžek, D.; Martina, B.; Fernando, S. Bcr-Abl Tyrosine Kinase Inhibitor Imatinib as a Potential Drug for COVID-19. Available online: <https://biorxiv.org/content/10.1101/2020.06.18.158196v2> (accessed on 20 February 2021).
61. Bojadzic, D.; Alcazar, O.; Chen, J.; Buchwald, P. Small-Molecule In Vitro Inhibitors of the Coronavirus Spike-ACE2 Protein-Protein Interaction as Blockers of Viral Attachment and Entry for SARS-CoV-2. Available online: <https://biorxiv.org/content/10.1101/2020.10.22.351056v1> (accessed on 20 February 2021).
62. Virtanen, Salla, I.; Niinivehmas, S.P.; Pentikäinen, O.T. Case-specific performance of MM-PBSA, MM-GBSA, and SIE in virtual screening. *J. Mol. Graph. Model.* **2015**, *62*, 303–318.
63. Wang, E.; Sun, H.; Wang, J.; Wang, Z.; Liu, H.; Zhang, J.Z.; Hou, T. End-point binding free energy calculation with MM/PBSA and MM/GBSA: Strategies and applications in drug design. *Chem. Rev.* **2019**, *119*, 9478–9508.
